# Supplementary material for: Effects of time window size and placement on the structure of an aggregated communication network
Source: Springer Nature journal article supplement (doi:10.1140/epjds4), 2012-05-18

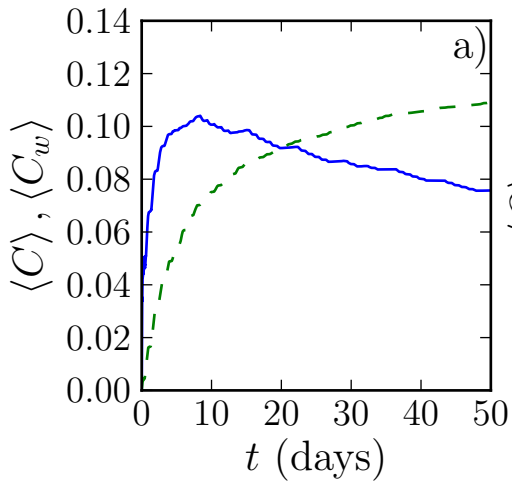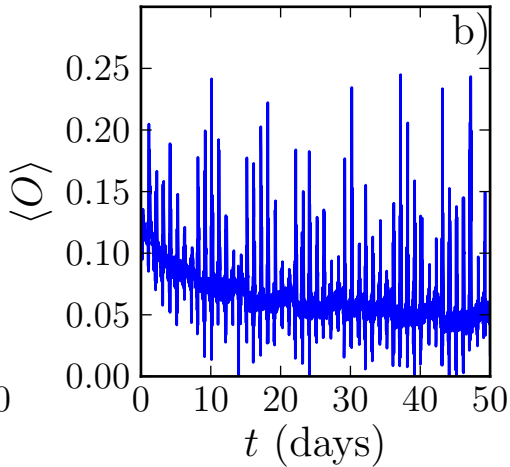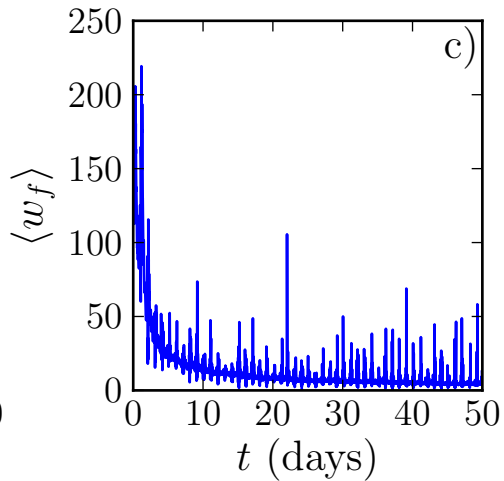

Supplement: 13688_2012_4_MOESM5_ESM.pdf [file 13688_2012_4_MOESM5_ESM.pdf]
