# Supplementary figures and images for: Effects of time window size and placement on the structure of an aggregated communication network
Source: Springer Nature journal article supplement (doi:10.1140/epjds4), 2012-05-18

a)  $t = 1$  day

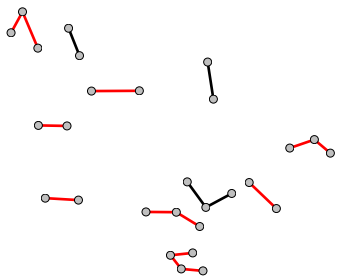

b)  $t = 1$  week

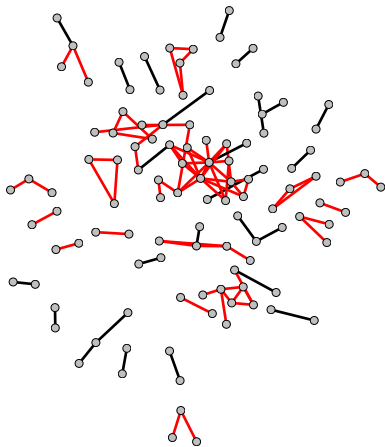

c)  $t = 4$  weeks

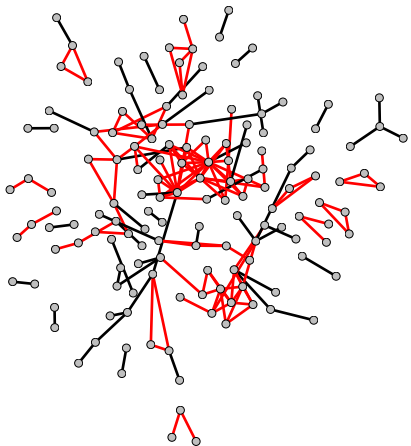

d)  $t = 6$  months

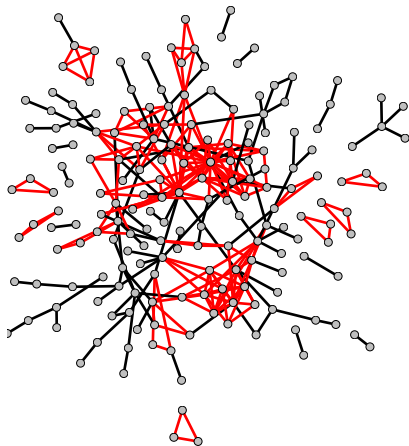

Supplement: 13688_2012_4_MOESM6_ESM.pdf [file 13688_2012_4_MOESM6_ESM.pdf]
